# Supplementary material
Source: Springer Nature journal article supplement (https://www.springermedizin.de/resource/supplementary/12885_2011_2761_MOESM4_ESM.pdf/9461936)

# PDGF.A

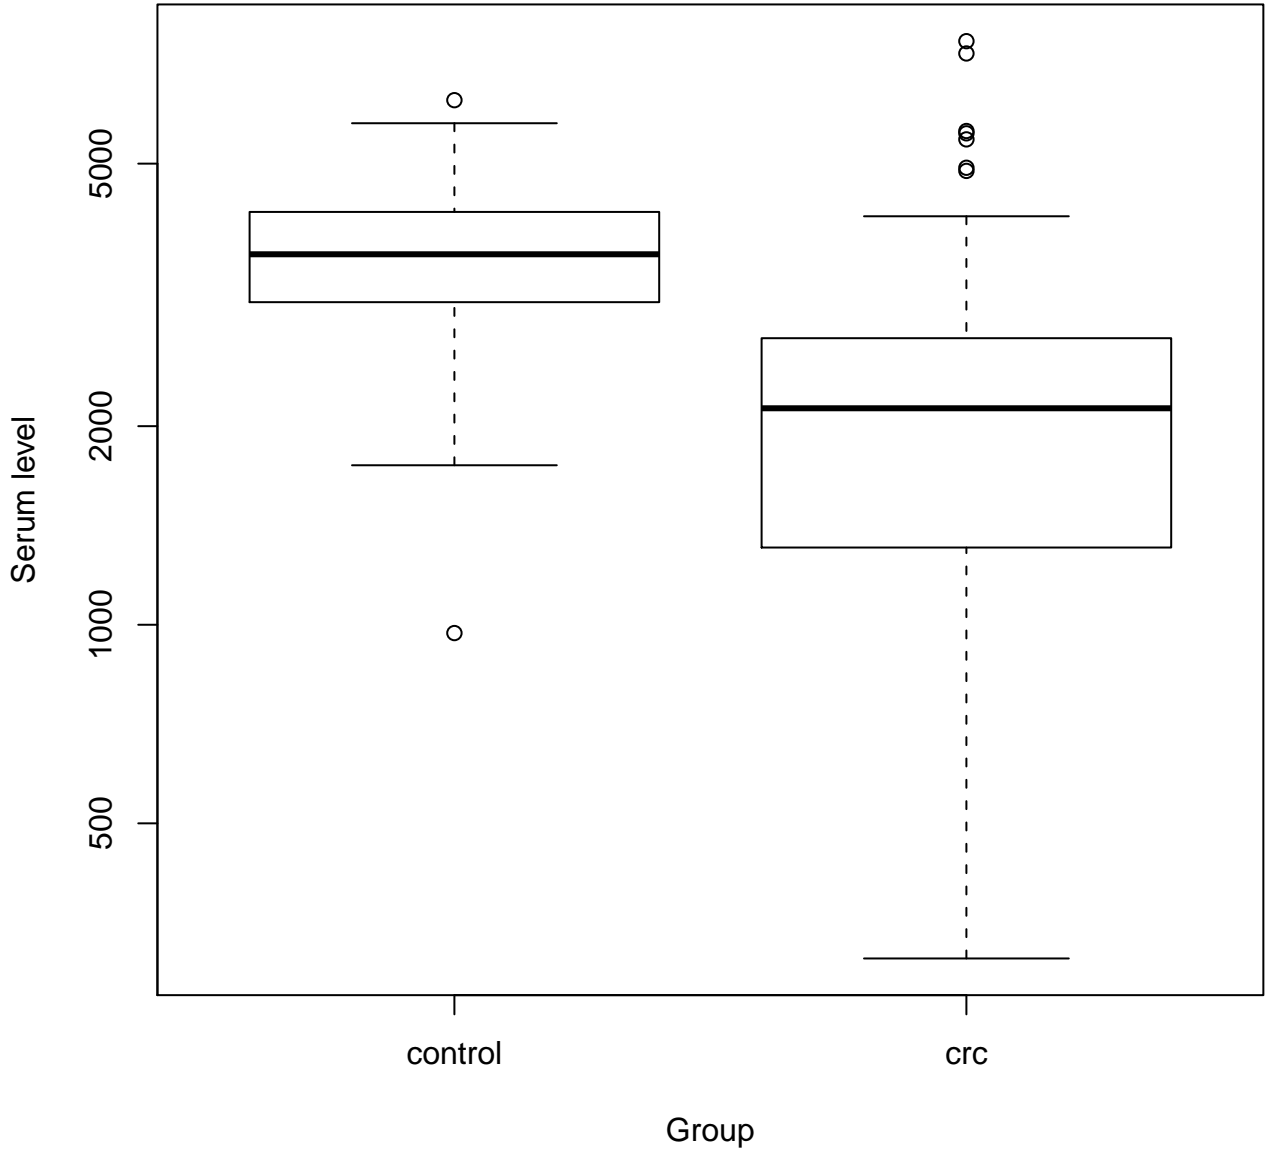

Supplement: MOESM4 [file 9461936]
